# Supplementary material for: TRIM59 loss in M2 macrophages promotes melanoma migration and invasion by upregulating MMP-9 and Madcam1
Source: publisher site journal article supplement (doi:10.18632/aging.102351), 2019-10-10
Supplement: Supplementary file [file aging-v11i19-102351-supplementary-material-SD1.pdf]

**SUPPLEMENTARY FIGURES**

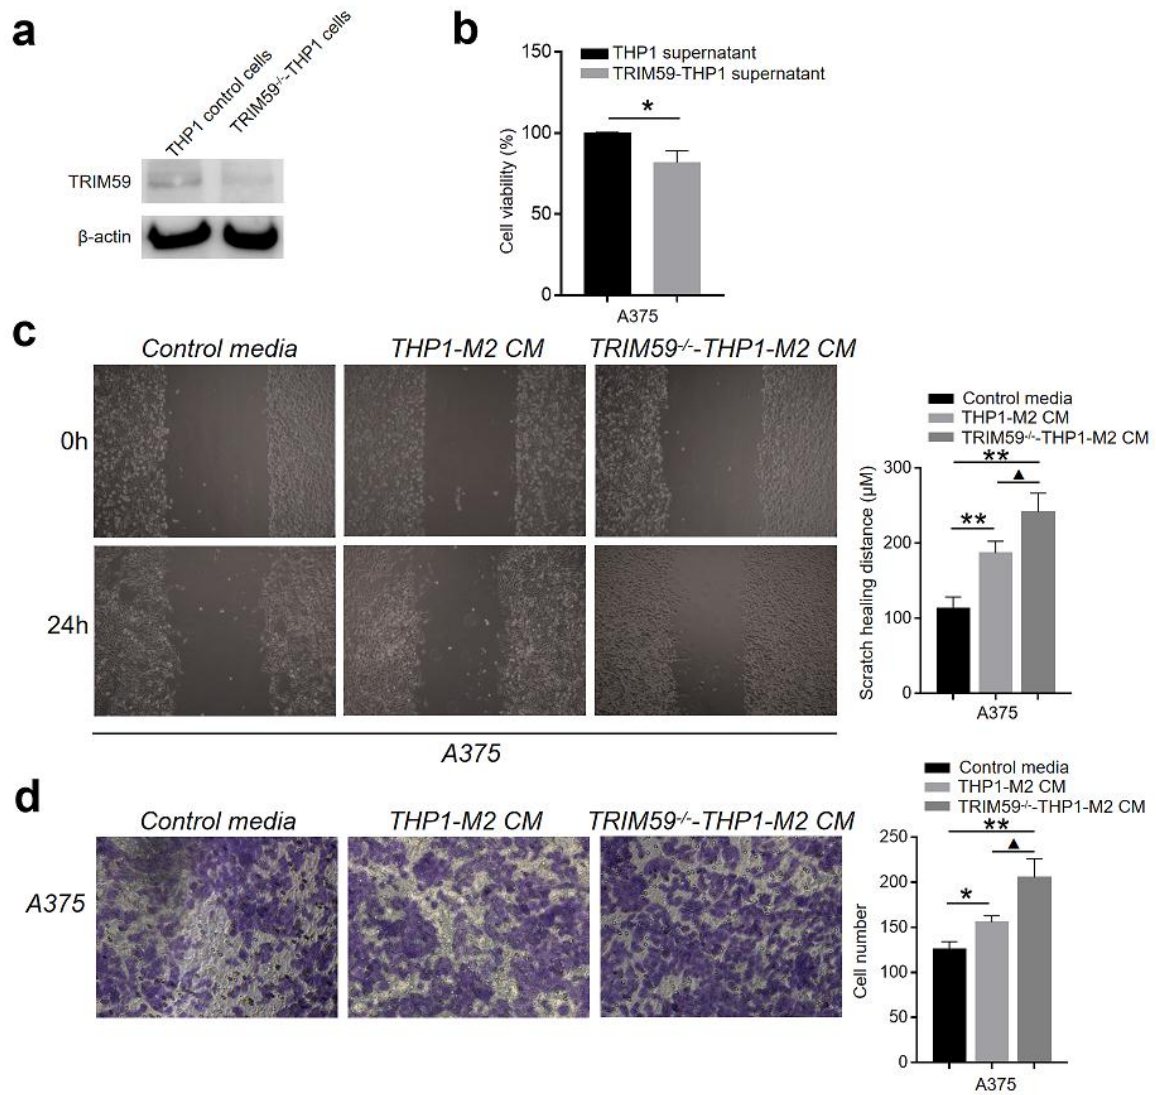

**Supplementary Figure 1.** (A) Expression of TRIM59 in THP1 cells transfected with *TRIM59*-shRNA, as assessed by western blotting. (B) CCK-8 showing that TRIM59 overexpressed THP1 has a cytotoxicity of 18.25% on A375 human melanoma cells. (C) Wound healing assay results showing the migratory ability of A375 cells in response to CM from Control media, THP1-M2 macrophage cultures or TRIM59<sup>-/-</sup>-THP1-M2 macrophage cultures. Data are represented as mean ± SD. \*\*p<0.01, compared with control media; ▲p<0.05, TRIM59<sup>-/-</sup>-THP1-M2 CM vs. THP1-M2 CM. (D) Transwell assays results showing the invasive ability of A375 cells in response to CM from Control media, THP1-M2 macrophage cultures or TRIM59<sup>-/-</sup>-THP1-M2 macrophage cultures. Data are represented as mean ± SD. \*p<0.05, \*\*p<0.01, compared with control media; ▲p<0.05, TRIM59<sup>-/-</sup>-THP1-M2 CM vs. THP1-M2 CM.

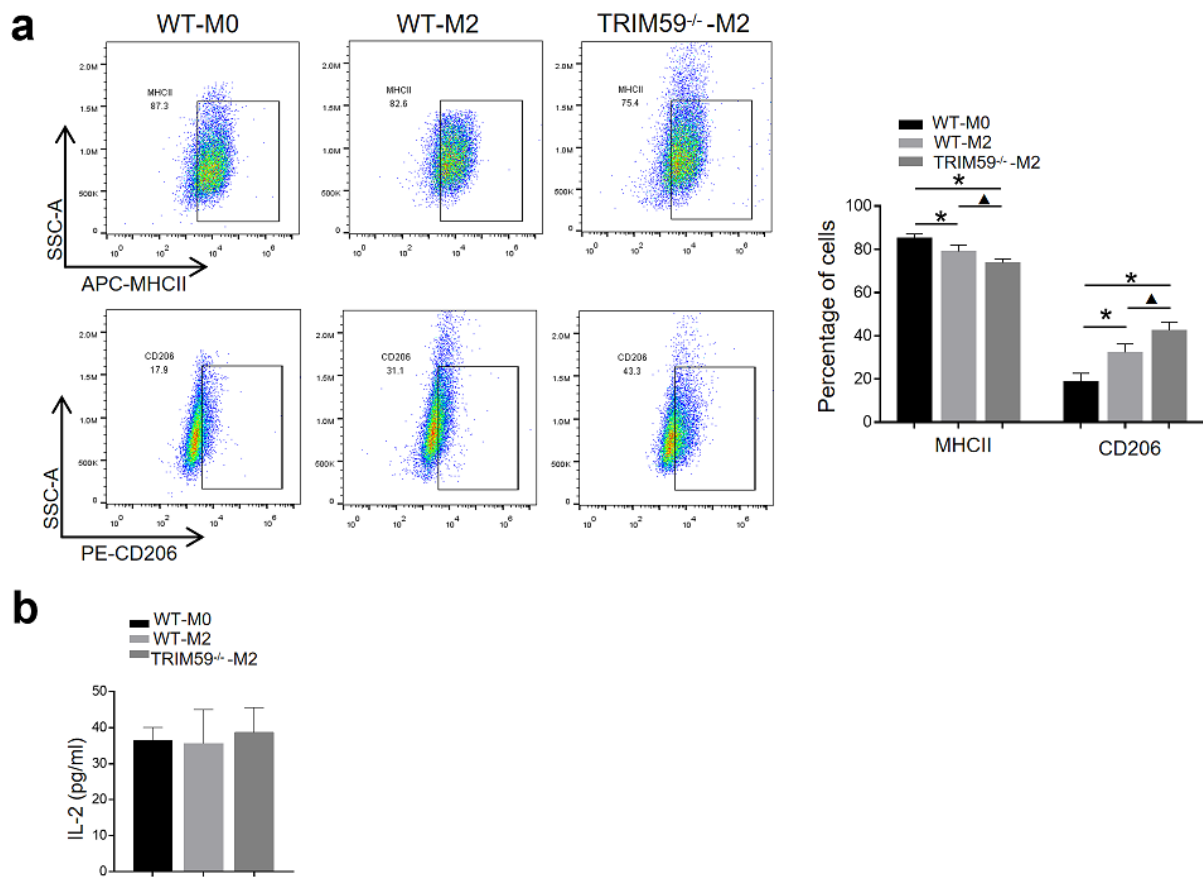

**Supplementary Figure 2. (A)** Flow cytometry analysis of macrophage subpopulations based on MHCII and CD206 expression. Data are represented as mean  $\pm$  SD. \* $p$ <0.05, compared to WT-M0 macrophages;  $\blacktriangle$   $p$ <0.05, TRIM59<sup>-/-</sup>-M2 vs. WT-M2. **(B)** ELISA detection of IL2 in culture supernatants from WT-M0, WT-M2, and TRIM59<sup>-/-</sup>-M2 macrophages. Data are represented as mean  $\pm$  SD.

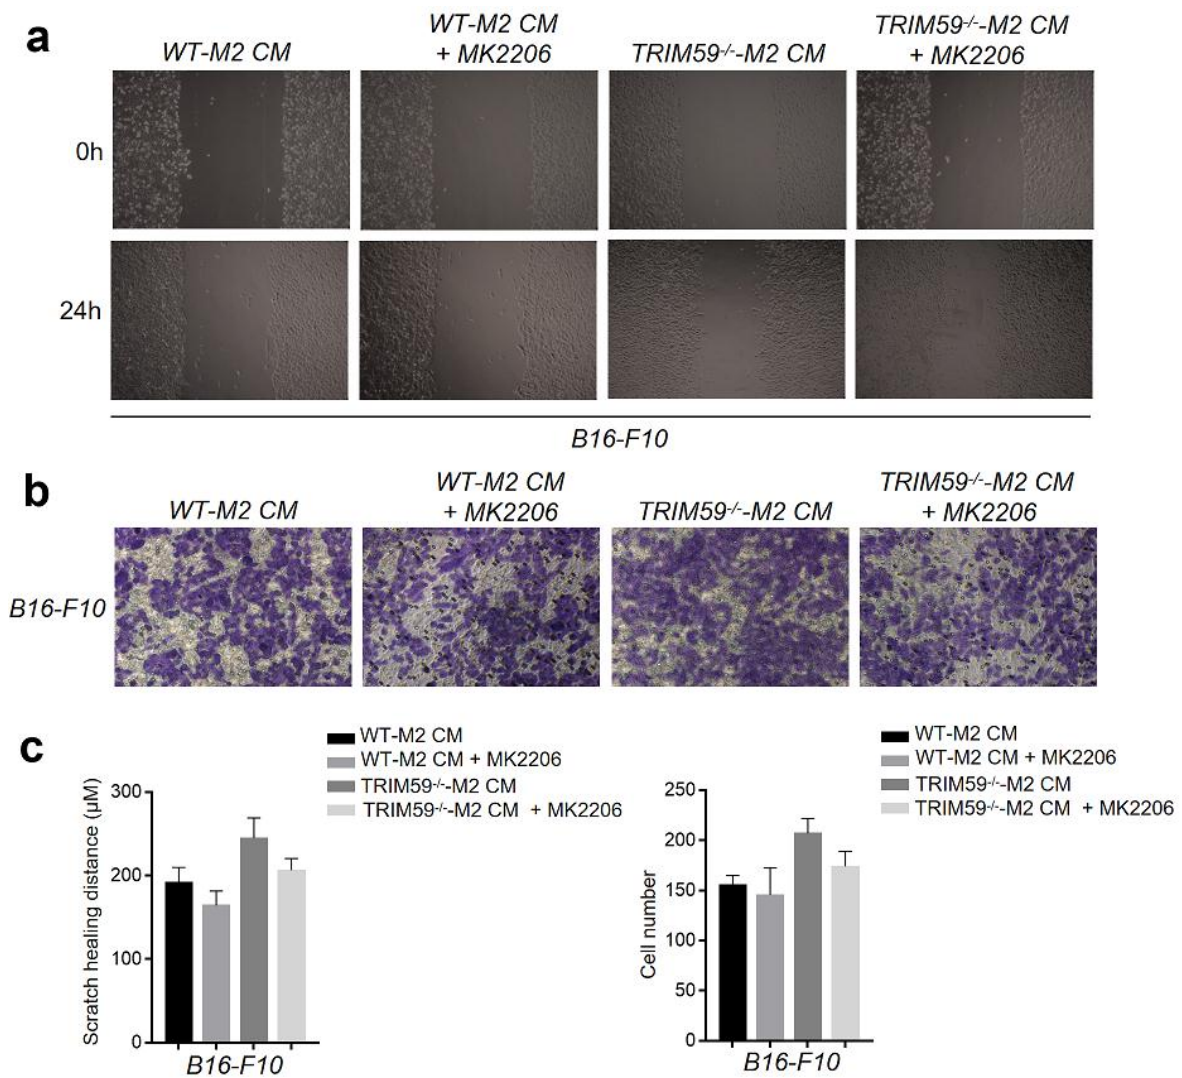

**Supplementary Figure 3.** (A) Wound healing assay results showing the migratory ability of B16-F10 cells in response to CM from M2 macrophage cultures in the presence of the Akt inhibitor MK2206. (B) Transwell assays results showing the invasive ability of B16-F10 cells in response to CM from M2 macrophage cultures in the presence of the Akt inhibitor MK2206. (C) Statistical analysis of (A) and (B). Data are represented as mean  $\pm$  SD.
